# Supplementary material
Source: publisher figshare collection journal article supplement (https://gsajournals.figshare.com/ndownloader/files/22111770)
Supplement: Supplementary file 1 [file 22111770]

**Table S1. *Neurospora crassa* strains used in this study**

| **Strain** | **Genotype** | **Source** |
| --- | --- | --- |
| N2930 | *mat A his-3-; ∆mus-52::bar+* | Honda et al., 2008 |
| N3012 | *mat a his-3-;* ∆*mus-52::bar*+ | FGSC#9539 |
| N3435 | *mat A his-3-; ∆hda-1::hph+* | Honda et al., 2016 |
| N3752 | *mat A* | FGSC#2489 |
| N5948 | *mat A* ∆*set-7::bar*+*;* ∆*hpo::hph+* | Jamieson et al., 2016 |
| N6049 | (*mat A his-3-; ∆mus-52::bar+* + *Pvvd::hH3-3xFLAG::his-3+*) | This study |
| N6054 | (*mat a his-3-; ∆mus-52::bar+* + *Pvvd::hH3-3xFLAG::his-3+*) | This study |
| N6336 | *mat A his-3-* ∆*lsd1::hph*+; ∆*dim-2::hph*+ | This study |
| N6338 | *mat A* ∆*lsd1::hph*+; ∆*dim-5::bar*+ | This study |
| N6340 | *mat a* ∆*lsd1::hph*+; *Tel IIIL::nat-1?*; ∆*hpo::hph*+ | This study |
| N6684 | *mat a Pvvd::hH3-3xFLAG::his-3*+; ∆*dim-2::hph*+ | This study |
| N6685 | *mat ? Pvvd::hH3-3xFLAG::his-3*+; ∆*dim-5::bar*+ | This study |
| N6687 | *mat a Pvvd::hH3-3xFLAG::his-3*+ | This study |
| N6690 | *mat ? Pvvd::hH3-3xFLAG::his-3*+; ∆*hpo::hph*+ | This study |
| N6732 | *mat a Pvvd::hH3-3xFLAG::his-3*+; ∆*hda-1::hph*+ | This study |
